# Supplementary material
Source: publisher figshare collection journal article supplement (https://rs.figshare.com/ndownloader/files/36578672)
Supplement: Supplementary file 1 [file 36578672]

# **Modeling predicts differences in CAR T cell signaling due to biological variability**

Vardges Tserunyan<sup>1</sup> and Stacey D. Finley<sup>1,2,3\*</sup>

**Supplementary Information**

**Supplementary Table 1.** Performance of the gradient boosted tree ensemble on various datasets.

| Construct used:<br>Antigen conc.: | First-generation                                    | Second-generation                                   |
|-----------------------------------|-----------------------------------------------------|-----------------------------------------------------|
| “Low”                             | $R^2 = 0.905 \pm 0.0008$<br>EV = 0.905 $\pm$ 0.0008 | $R^2 = 0.900 \pm 0.0004$<br>EV = 0.900 $\pm$ 0.0004 |
| “High”                            | $R^2 = 0.816 \pm 0.0024$<br>EV = 0.816 $\pm$ 0.0024 | $R^2 = 0.807 \pm 0.0035$<br>EV = 0.807 $\pm$ 0.0035 |

## Supplementary Figures

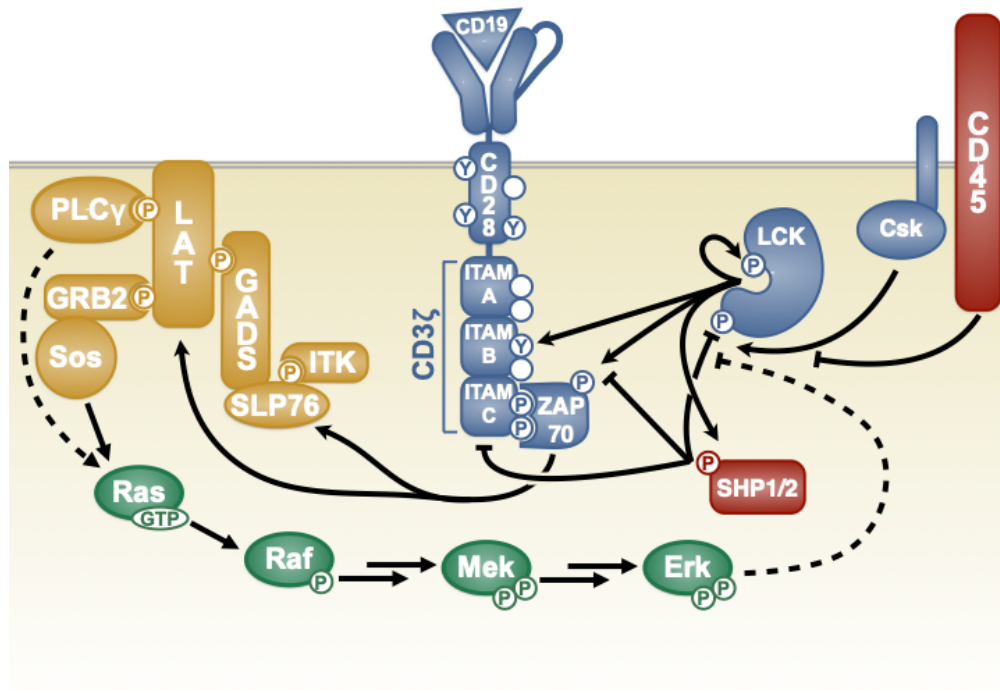

**Supplementary Figure 1. Schematic of CAR T cell signaling model.** We consider four modules. *Module I* (blue): CAR activation by LCK (whose catalytic activity is regulated by autophosphorylation and the inhibitory kinase, CSK). *Module II* (red): inhibition of CAR activation by phosphatases CD45 and SHP1/2. *Module III* (yellow): formation of the LAT signalosome, a multi-protein complex. *Module IV* (green): downstream signaling in the MAPK pathway, leading to ERK activation. Lines with bar indicate inhibition; lines with arrowheads indicate activation steps.

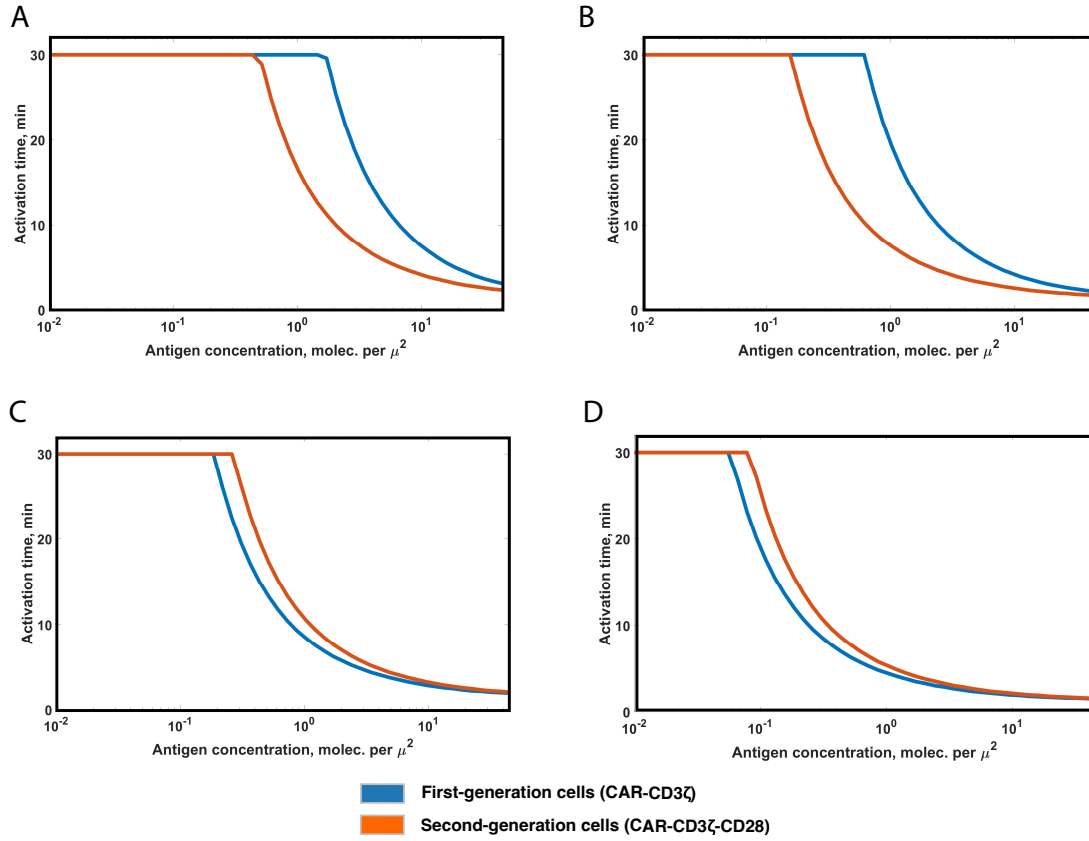

**Supplementary Figure 2. Dose response curves of cell activation times.** We varied the level of antigen exposure and simulated the activation time for different conditions. (A) Default parameters; (B) Optimized value for  $Kcat\_ZAP$ , (C) Optimized value for  $Kcat\_LCKPU\_CD3z$ , (D) Optimized values for both  $Kcat\_ZAP$  and  $Kcat\_LCKPU\_CD3z$ .

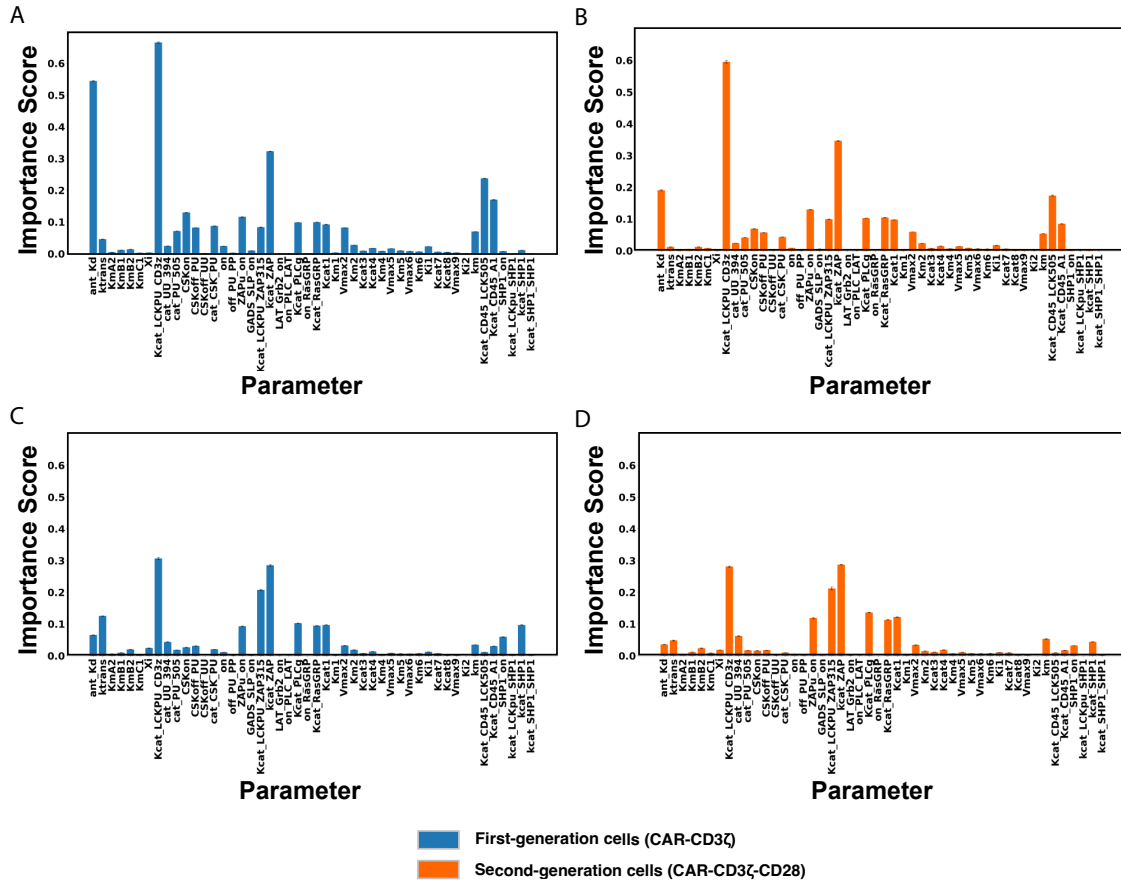

**Supplementary Figure 3. Permutation importance scores for 48 kinetic parameters used for creating a machine learning model to predict cell activation times.** A gradient boosted tree was used to predict the cell activation times based on model kinetic parameters. We show the permutation importance scores for all kinetic parameters under different conditions: (A) CAR-CD3ζ with low antigen concentration, (B) CAR-CD3ζ-CD28 with low antigen concentration, (C) CAR-CD3ζ with high antigen concentration, (D) CAR-CD3ζ-CD28 with high antigen concentration.

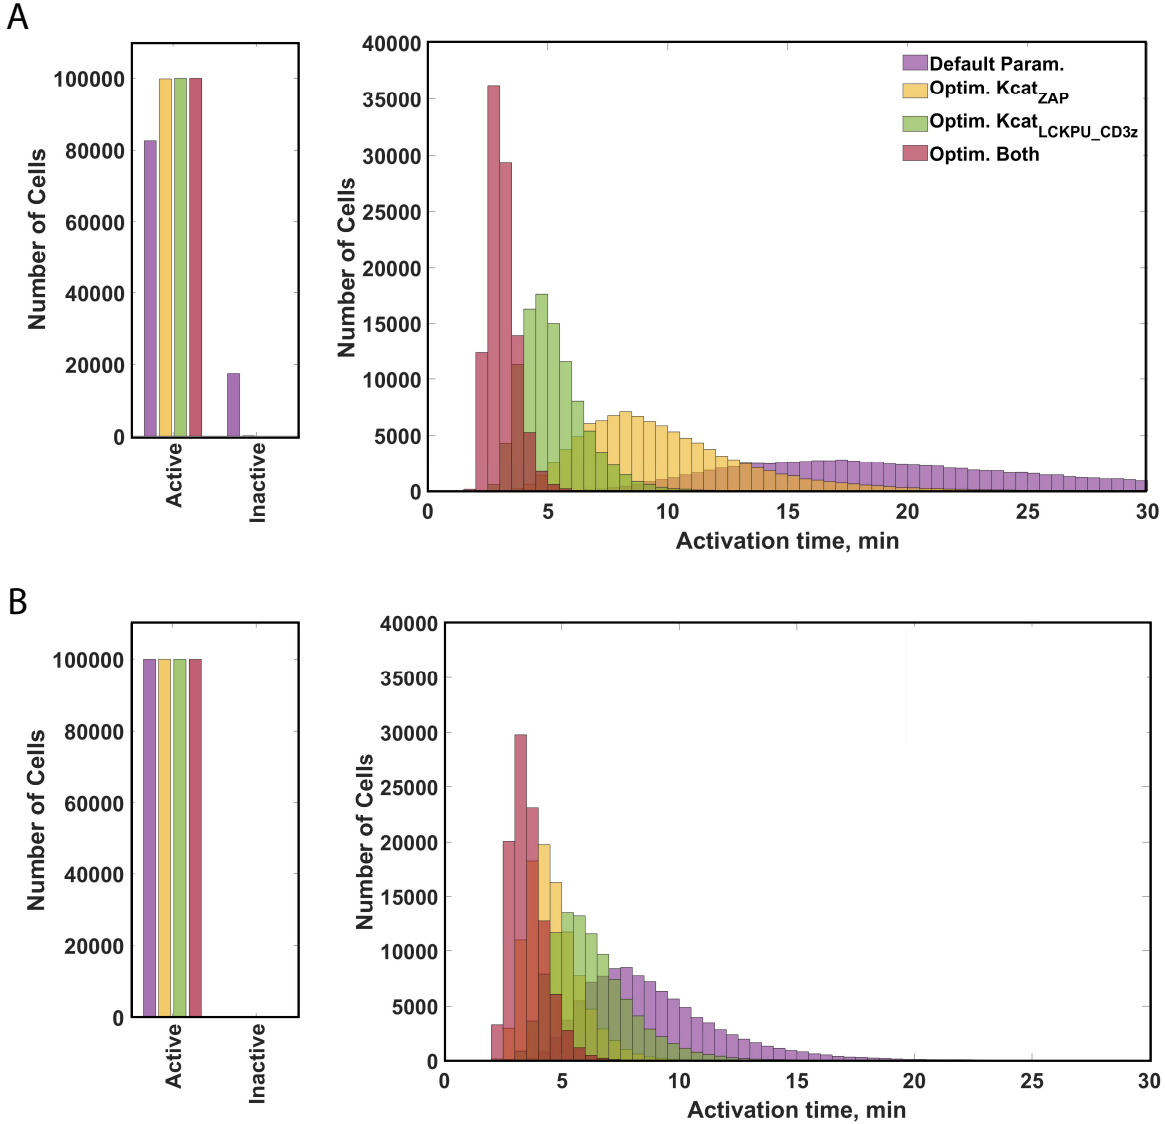

**Supplemental Figure 4. Comparison of activation of CAR T cells with optimized parameter values.** We show the number of cells activated and their activation times, showing shifts in the response of CAR-T cells with optimized kinetic parameters under antigen variation. Note, this is the same simulation data as shown in Fig. 1 and Fig. 6. (A) Comparison of the number of activated cells and their activation times for default and optimized parameter values among cells with first-generation CAR constructs (CAR-CD3 $\zeta$ ); (B) Comparison of the number of activated cells and their activation times for default and optimized parameter values among cells with second-generation CAR constructs (CAR-CD3 $\zeta$ -CD28).

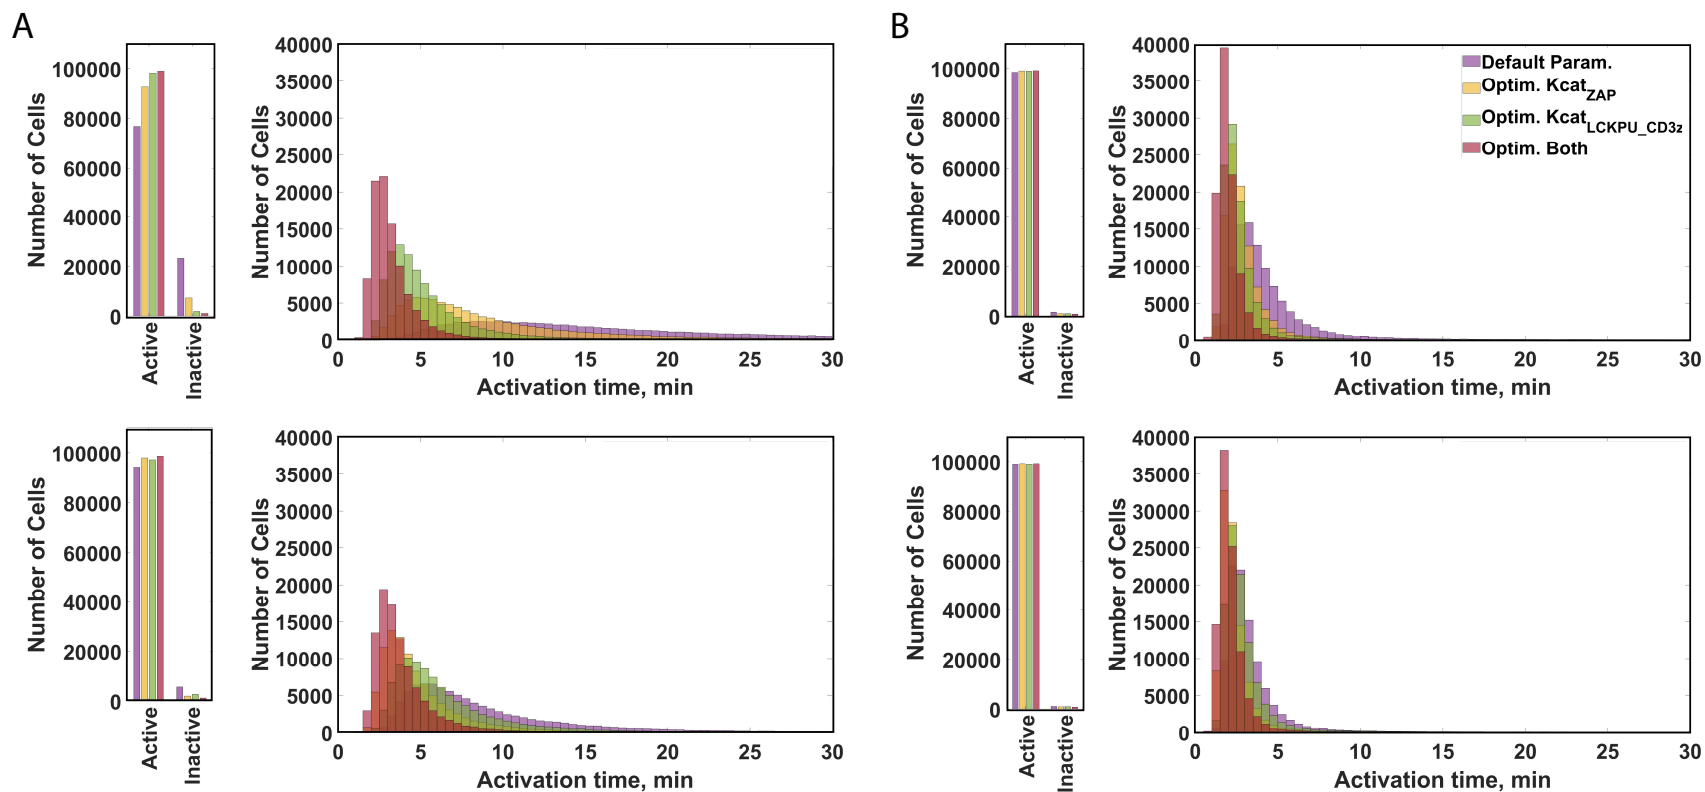

**Supplemental Figure 5. Comparison of activation of CAR T cells with optimized parameter values.** We show the number of cells activated and their activation times, showing shifts in the response of CAR-T cells with optimized kinetic parameters under kinetic parameter variation. Note, this is the same simulation data as shown in **Fig. 2** and **Fig. 7**. (A) Comparison of the number of activated cells and their activation times for default and optimized parameter values among cells with first-generation CAR constructs (CAR-CD3 $\zeta$ ), top row: low antigen stimulation, bottom row: high antigen stimulation; (B) Comparison of the number of activated cells and their activation times for default and optimized parameter values among cells with second-generation CAR constructs (CAR-CD3 $\zeta$ -CD28). *Top*: low antigen stimulation, *bottom*: high antigen stimulation.
